# Supplementary material
Source: Springer Nature journal article supplement (https://www.springermedizin.de/resource/supplementary/12880_2008_60_MOESM3_ESM.pdf/9450492)

Males

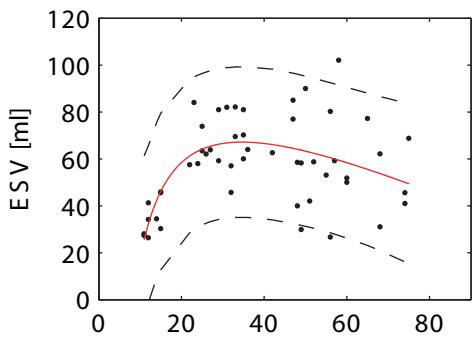

Females

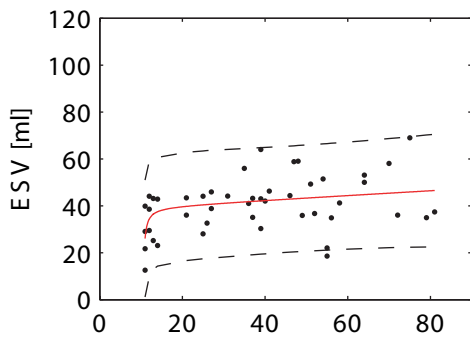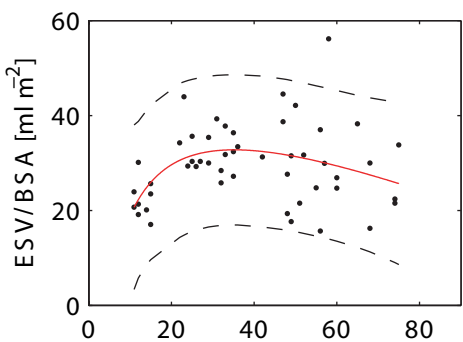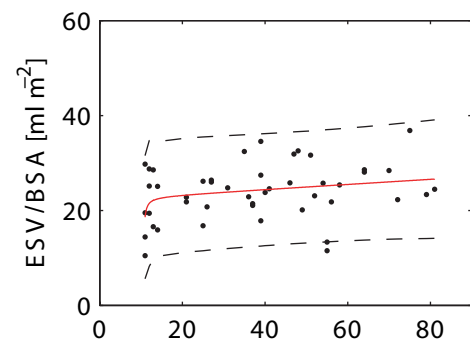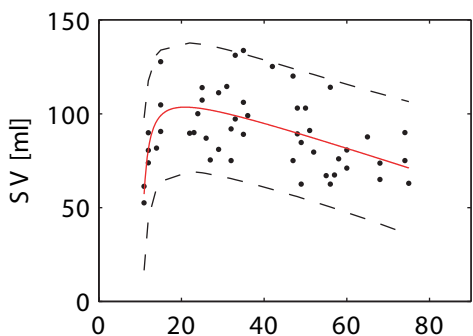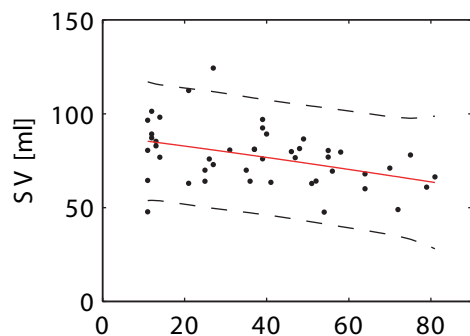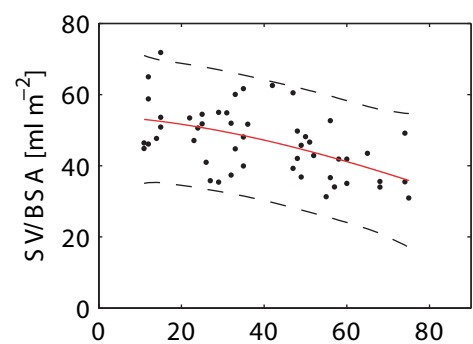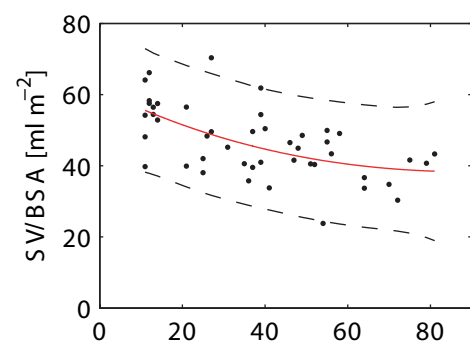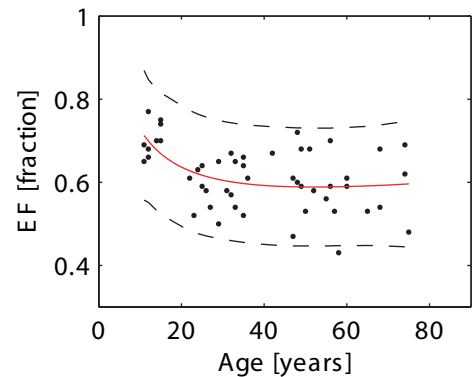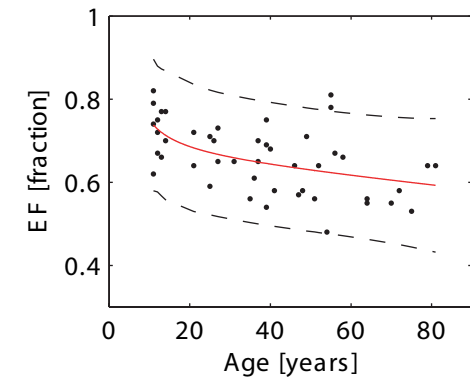

Supplement: MOESM3 [file 9450492]
